# Ugo1 and Mdm30 act sequentially during Fzo1-mediated mitochondrial outer membrane fusion

Fabian Anton<sup>1,2</sup>, Julia M. Fres<sup>1,3</sup>, Astrid Schauss<sup>1,2</sup>, Benoît Pinson<sup>4</sup>, Gerrit J. K. Praefcke<sup>1,3</sup>, Thomas Langer<sup>1,2,3,5</sup> and Mafalda Escobar-Henriques<sup>1,4,\*</sup>

<sup>1</sup>Institute for Genetics, University of Cologne, 50674 Cologne, Germany

<sup>2</sup>Cologne Excellence Cluster on Cellular Stress Responses in Aging-Associated Diseases (CECAD), 50674 Cologne, Germany

<sup>3</sup>Center for Molecular Medicine Cologne (CMMC), 50674 Cologne, Germany

<sup>4</sup>Institut de Biochimie et Génétique Cellulaires (IBGC), CNRS, UMR5095, Bordeaux, France

<sup>5</sup>Max-Planck-Institute for the Biology of Aging, 50931 Cologne, Germany

\*Author for correspondence ([Mafalda.Escobar@ibgc.cnrs.fr](mailto:Mafalda.Escobar@ibgc.cnrs.fr))

Accepted 23 November 2010

Journal of Cell Science 124, 1126–1135

© 2011. Published by The Company of Biologists Ltd

doi:10.1242/jcs.073080

## Summary

Dynamamin-related GTPase proteins (DRPs) are main players in membrane remodelling. Conserved DRPs called mitofusins (Mfn1/Mfn2/Fzo1) mediate the fusion of mitochondrial outer membranes (OM). OM fusion depends on self-assembly and GTPase activity of mitofusins as well as on two other proteins, Ugo1 and Mdm30. Here, we define distinct steps of the OM fusion cycle using *in vitro* and *in vivo* approaches. We demonstrate that yeast Fzo1 assembles into homo-dimers, depending on Ugo1 and on GTP binding to Fzo1. Fzo1 homo-dimers further associate upon formation of mitochondrial contacts, allowing membrane tethering. Subsequent GTP hydrolysis is required for Fzo1 ubiquitylation by the F-box protein Mdm30. Finally, Mdm30-dependent degradation of Fzo1 completes Fzo1 function in OM fusion. Our results thus unravel functions of Ugo1 and Mdm30 at distinct steps during OM fusion and suggest that protein clearance confers a non-cycling mechanism to mitofusins, which is distinct from other cellular membrane fusion events.

**Key words:** Fusion, Dynamamin-related proteins, Mitochondria, Proteolysis, Ubiquitylation

## Introduction

A proper control of membrane dynamics and content mixing between organelles is essential for cellular communication (Martens and McMahon, 2008). Endocytosis and mitochondrial fusion and fission are processes promoted by dynamamin-related GTPase proteins (DRPs), whose regulation differs significantly from other GTPases (Hinshaw and Schmid, 1995; Hoppins et al., 2007; Lackner and Nunnari, 2008; Okamoto and Shaw, 2005; Praefcke and McMahon, 2004). Whereas conventional GTPases function as molecular switches, cycling between inactive GDP-bound and active GTP-bound forms (Vetter and Wittinghofer, 2001), the activity and downstream signalling of DRPs occur concomitantly with GTP hydrolysis (Praefcke and McMahon, 2004). In addition, the GTPase activities of DRPs are stimulated by homo-oligomerization, and evidence for co-regulators is scarce (Gasper et al., 2009). Recent findings provide profound insight into the role of Dnm1/Drp1 and mitochondrial genome maintenance protein 1 (Mgm1/Opa1), i.e. the DRPs promoting mitochondrial fission or inner membrane (IM) fusion, respectively (DeVay et al., 2009; Ingerman et al., 2005; Lackner et al., 2009; Meglei and McQuibban, 2009; Rujiviphat et al., 2009; Zick et al., 2009). However, the mechanisms underlying the fusion of mitochondrial outer membranes (OM), triggered by DRPs called mitofusins, remain poorly understood.

Mitochondrial fusion occurs as a multistep process starting with organelle tethering followed by OM and IM fusion (Detmer and Chan, 2007). IM fusion relies on long and short isoforms of Mgm1/Opa1, which are anchored to the IM or are soluble in the inner membrane space (IMS), respectively (Herlan et al., 2003; Meeusen et al., 2006; Sesaki et al., 2003; Wong et al., 2003).

Mgm1 isoforms oligomerize and associate with phospholipids to form a functional GTPase complex (DeVay et al., 2009; Meglei and McQuibban, 2009; Rujiviphat et al., 2009; Zick et al., 2009). OM fusion depends on the assembly and GTPase activity of mitofusins, termed Mfn1 and Mfn2 in mammals and Fzo1 (fuzzy onions homolog 1) in yeast (Griffin and Chan, 2006; Hales and Fuller, 1997; Hermann et al., 1998; Meeusen et al., 2004; Neuspiel et al., 2005; Rojo et al., 2002). Both *in vitro* and recent *in vivo* data demonstrate that GTP hydrolysis is necessary for OM fusion (Amiott et al., 2009; Meeusen et al., 2004). Moreover, *in vitro* assays have shown that tethering of Fzo1 *in trans*, i.e. between opposed mitochondria, is also required (Meeusen et al., 2004). Mitofusins are anchored to the OM by two transmembrane domains and are exposed to the cytoplasm, allowing regulation of OM fusion by cytosolic proteins like mitochondrial distribution and morphology protein 30 (Mdm30). Heptad repeats both at the N- and C-terminus of mitofusins mediate self-association and probably the *trans* tethering of mitochondria (Griffin and Chan, 2006; Koshiba et al., 2004).

In yeast, two additional proteins have been identified that are required for OM fusion, Ugo1 (for fusion in Japanese) and Mdm30 (Dimmer et al., 2002; Fritz et al., 2003; Sesaki and Jensen, 2001). Ugo1 is a modified carrier protein in the OM that appears to operate after OM tethering (Coonrod et al., 2007; Hoppins et al., 2009). Ugo1 possesses three transmembrane domains and exposes its N-terminus to the cytosol (Coonrod et al., 2007; Hoppins et al., 2009). *In vitro* binding assays with recombinant proteins revealed that the N-terminus of Ugo1 directly interacts with the cytosolic regions adjacent to the transmembrane domains in Fzo1 (Sesaki

and Jensen, 2004). Interestingly, Ugo1 physically interacts with both Fzo1 and Mgm1, is required for both IM and OM fusion, and might coordinate both events (Hoppins et al., 2009; Sesaki and Jensen, 2004; Wong et al., 2003). Mdm30 is a cytosolic, mitochondria-associated F-box protein that binds to Fzo1 (Escobar-Henriques et al., 2006). The absence of Mdm30 impairs fusion, leading to aggregation of fragmented mitochondria, as revealed by electron microscopy analysis (Durr et al., 2006). Mdm30 regulates mitochondrial fusion by mediating Fzo1 ubiquitylation and degradation in an F-box-dependent manner (Cohen et al., 2008; Escobar-Henriques et al., 2006; Fritz et al., 2003). Moreover, Mdm30 is also responsible for the ubiquitylation of Mdm34, one of the OM components of the ERMES (ER-mitochondria encounter structure) complex, involved in the tethering between mitochondria and the endoplasmic reticulum (Kormann et al., 2009; Ota et al., 2008). Independent of its mitochondrial roles, Mdm30/Dsg1 promotes ubiquitin-mediated degradation of Gal4 and stimulates nuclear export of specific mRNAs (Li et al., 2010; Muratani et al., 2005; Shukla et al., 2009).

Here, we further define the role of the mitofusin GTPase and its interacting partners Ugo1 and Mdm30 in OM fusion, using a series of Fzo1 mutant forms. Our findings integrate the GTPase cycle of Fzo1 and the function of Ugo1 and Mdm30 with the successive self-assembly and degradation of Fzo1, and provide novel insights into the mechanism of OM fusion *in vivo*.

## Results

### Fzo1 dimerizes in the OM of mitochondria

Mitofusins from yeast to mammals assemble in the mitochondrial OM to high molecular weight complexes of unknown composition (Eura et al., 2003; Rapaport et al., 1998). When solubilized yeast mitochondria were subjected to size-exclusion chromatography, the mitofusin Fzo1 eluted in fractions that corresponded to an

apparent molecular weight of ~400 kDa (Fig. 1A). This complex probably represents a 'cis' form in one membrane because mitochondria become fragmented during the isolation procedure, disrupting tethered structures from intermitochondrial associations (here called 'trans' associations) (Fuchs et al., 2002; Ishihara et al., 2004; Meeusen et al., 2004). To examine whether mitofusins assemble into homo-oligomeric complexes, as is the case with other dynamins (Praefcke and McMahon, 2004), a FLAG-Fzo1 protein was expressed in yeast and purified to near homogeneity (Fig. 1B). Purified Fzo1 eluted in the same fractions as mitochondrial Fzo1 during size-exclusion chromatography, indicating that the endogenous Fzo1 complex is homo-oligomeric (Fig. 1C, compare with Fig. 1A). We then performed crosslinking experiments to determine the number of Fzo1 subunits in this complex. Glutaraldehyde was chosen as a crosslinking agent in order to detect close contacts and to ensure efficient crosslinking. Purified Fzo1 could be crosslinked to an Fzo1 dimer, as revealed by its electrophoretic mobility in SDS-PAGE (Fig. 1D). We observed an identical apparent molecular mass of the endogenous Fzo1 complex and the crosslinked purified Fzo1 dimer (Fig. 1A,E, compare fractions 11 to 19 from both panels), demonstrating that the Fzo1 complex does not contain proteins other than two Fzo1 subunits under the conditions used. It should be noted that the apparent molecular mass of ~400 kDa for the Fzo1 complex in size-exclusion chromatography exceeds the size of Fzo1 dimers, given the molecular weight of Fzo1 subunits of 98 kDa. The difference in the apparent molecular mass and the calculated mass of the dimer probably reflects detergent micelle artefacts. Similar observations have indeed been made for other membrane proteins (Arlt et al., 1996; DeVay et al., 2009; Leonhard et al., 1996). For instance, two Mgm1 variants differing in the presence of a hydrophobic transmembrane region of 12 kDa, show differential behaviour during size-exclusion chromatography, although both

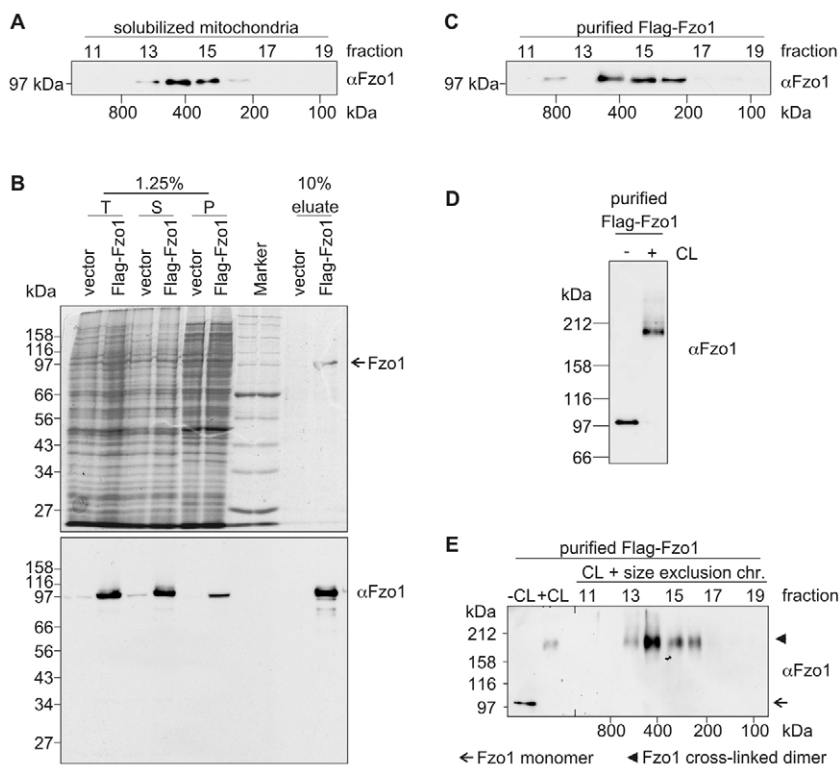

**Fig. 1. Fzo1 assembles into a homo-dimer.** (A) Complex formation of Fzo1. Solubilized mitochondrial extracts were fractionated by size-exclusion chromatography and eluate fractions analysed by SDS-PAGE and immunoblotting using Fzo1-specific antibodies ( $\alpha$ Fzo1). (B) Purification of the Fzo1 protein. Solubilized crude mitochondrial extracts of wild-type yeast cells overexpressing FLAG-Fzo1 were subjected to immunoprecipitation using FLAG-specific antibodies. Immunoprecipitated FLAG-Fzo1 was eluted with a FLAG-peptide and analysed by Coomassie Blue staining (top) or immunoblotting with Fzo1-specific antibodies (bottom). Total extracts (T), supernatant (S) and pellet (P) fractions after solubilization as well as proteins eluted with the triple FLAG-peptide (eluate) are shown. (C) Complex formation of purified Fzo1 protein. Purified FLAG-Fzo1 was subjected to size-exclusion chromatography and eluate fractions were analysed by SDS-PAGE and immunoblotting using Fzo1-specific antibodies. (D) Crosslinking of purified Fzo1. FLAG-Fzo1 was purified as described for B and eluates treated or not with glutaraldehyde as indicated (+CL or -CL) and analysed by SDS-PAGE followed by immunoblotting using Fzo1-specific antibodies. (E) Complex formation of the crosslinked Fzo1 dimer. Purified Fzo1 was crosslinked and analysed by size-exclusion chromatography. The Fzo1 monomer and crosslinked dimer are indicated by arrow and arrowhead, respectively.

forms were demonstrated to be monomers (DeVay et al., 2009). We therefore conclude that Fzo1 assembles into homo-dimeric complexes in the mitochondrial OM.

### Fzo1 dimerization depends on GTP binding

To assess the importance of GTP binding and hydrolysis for Fzo1 homo-dimerization, we introduced point mutations in the P-loop (GxxxxGK[S/T]) and switch motifs of the GTPase domain of Fzo1 (Fig. 2A). It has previously been demonstrated that consensus mutations in the P-loop affect GTP binding, whereas in general mutations in the switch 1 region impair GTP hydrolysis (Amiott et al., 2009; Ishihara et al., 2004; Marks et al., 2001; Praefcke et al., 2004). Moreover, we created seven further Fzo1 variants introducing mutations in non-consensus, hydrophilic residues of the P-loop and switch regions of Fzo1 (depicted in Fig. 2A). The Fzo1 mutants were expressed in cells lacking Fzo1 ( $\Delta fzo1$ ) and the respiratory cell growth was assessed. The absence of functional Fzo1 protein leads to respiratory deficiency, i.e. impaired growth

on non-fermentable carbon sources, as a consequence of mitochondrial DNA loss (Griffin and Chan, 2006; Hermann et al., 1998). This analysis confirmed that three canonical mutations in the P-loop (K200A and S201N) and switch region (T221A) inactivated Fzo1, and identified three additional residues (D195, N197 and D320) to be essential for Fzo1 functionality (Fig. 2A, bold, and supplementary material Fig. S1A).

It is conceivable that mutations inactivating Fzo1 affect its dimerization. We therefore examined complex formation of these Fzo1 mutants by sucrose gradient centrifugation. Fzo1 P-loop mutants were recovered in less-dense fractions than was wild-type Fzo1 (Fig. 2B, left panel, and supplementary material Fig. S1B), indicating impaired assembly. Crosslinking experiments with purified Fzo1 or Fzo1<sup>D195A</sup> demonstrated an impaired dimerization of the Fzo1 P-loop mutant form (Fig. 2C). These results indicate that Fzo1 dimerization requires GTP binding. By contrast, the assembly of Fzo1 dimers was not affected by mutations in the switch regions (Fig. 2B, right panel, and supplementary material

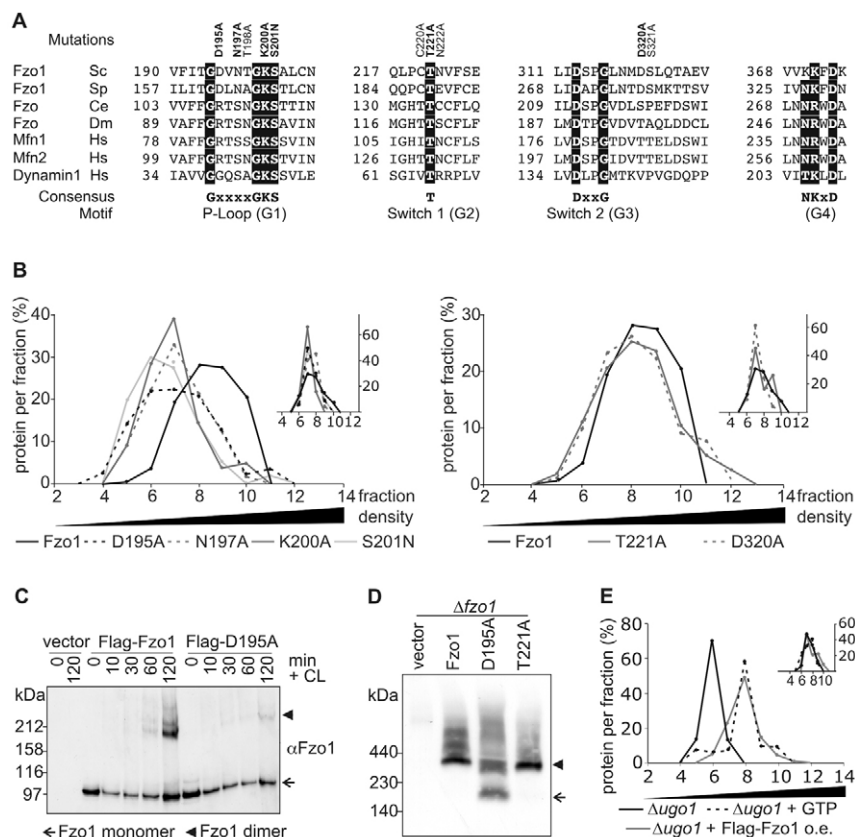

**Fig. 2. Integrity of the P-loop of Fzo1 and Ugo1 are necessary for Fzo1 homo-dimerization.** (A) Multiple protein sequence alignment (score matrix: Blosum62) of the GTPase domains of Fzo1 and Mfn proteins from various eukaryotic species and of human dynamin 1. Sc, *Saccharomyces cerevisiae*; Sp, *Schizosaccharomyces pombe*; Ce, *Caenorhabditis elegans*; Dm, *Drosophila melanogaster*; Hs, *Homo sapiens*. Consensus motifs within the GTPase domain are highlighted in black. Numbers refer to amino acid positions. Mutations that were introduced in *S. cerevisiae* Fzo1 are indicated. Mutations in Fzo1 inhibiting respiration are shown in bold. (B) Complex formation of Fzo1 mutants. Crude mitochondrial extracts from  $\Delta fzo1$  cells expressing the indicated Fzo1 forms were solubilized and analysed by sucrose gradient centrifugation. All fractions were recovered and subjected to SDS-PAGE and immunoblotting (supplementary material Fig. S1B). Fractionation of a crossreactive band, used as an internal control, is shown in the inset. Fzo1 P-loop mutants are grouped in the left panel, whereas switch mutants are depicted in the right panel. Total Fzo1 detected was set to 100%. (C) Crosslinking of purified Fzo1 or Fzo1<sup>D195A</sup>. Purified Fzo1 or Fzo1<sup>D195A</sup> were crosslinked for the indicated time as described in Fig. 1D and analysed by SDS-PAGE and immunoblotting using Fzo1-specific antibodies. (D) Complex formation of Fzo1, Fzo1<sup>D195A</sup> or Fzo1<sup>T221A</sup> monitored by BN-PAGE. Solubilized mitochondria, which were isolated from  $\Delta fzo1$  cells expressing the indicated Fzo1 forms or containing the expression vector only, were analysed by BN-PAGE and immunoblotted using Fzo1-specific antibodies. (E) Complex formation of Fzo1 in  $\Delta ugo1$  cells. Crude mitochondrial extracts from  $\Delta ugo1$  cells overexpressing Fzo1 and supplemented with 1 mM GTP when indicated were analysed by sucrose gradient centrifugation as in B.

Fig. S1B), including the canonical mutant Fzo1<sup>T221A</sup> that does not hydrolyse GTP (Amiott et al., 2009). The assembly properties of the P-loop Fzo1<sup>D195A</sup> and the switch Fzo1<sup>T221A</sup> mutants were corroborated by blue native PAGE (BN-PAGE) analysis (Fig. 2D). Together, these results indicate that Fzo1 dimerization relies on GTP binding but does not require GTP hydrolysis.

**Ugo1 promotes Fzo1 dimerization**

The mitofusin-interacting proteins Ugo1 and Mdm30 are required for mitochondrial OM fusion (Fritz et al., 2003; Sesaki and Jensen, 2001). Because an essential role of Mdm30 for the assembly of the Fzo1 complex has been excluded previously (Escobar-Henriques et al., 2006), we assessed a possible role of Ugo1 for Fzo1 assembly using sucrose gradient centrifugation. Interestingly, we observed a similar sedimentation profile of the Fzo1 complex in cells lacking Ugo1 (*Δugo1*) (Fig. 2E, solid black line) and in cells expressing the Fzo1 P-loop mutants (Fig. 2B), suggesting that Ugo1 is necessary for Fzo1 dimerization. However, Fzo1 levels are decreased in *Δugo1* cells (Amiott et al., 2009; Escobar-Henriques et al., 2006) and indirect effects cannot be excluded because DRP self-assembly is concentration-dependent. We therefore examined Fzo1 dimerization in cells lacking Mgm1 (*Δmgm1*), which show a similar reduction of Fzo1 levels as *Δugo1* cells (Amiott et al.,

2009; Escobar-Henriques et al., 2006). We observed a normal Fzo1 assembly in the absence of Mgm1 (supplementary material Fig. S1C), demonstrating that Ugo1 participates specifically in Fzo1 assembly. Interestingly, overexpression of Fzo1 (~30-fold) alleviated the requirement of Ugo1 for Fzo1 assembly (Fig. 2E, compare grey and black solid lines). Similarly, the Fzo1 assembly was restored in *Δugo1* mitochondrial extracts upon addition of GTP (Fig. 2E, compare solid and dashed black lines). Consistent with Ugo1 interaction with the C-terminal part of Fzo1 (Sesaki and Jensen, 2004), a partial destabilization of complex formation was observed upon truncation of the C-terminal coiled-coil domain of Fzo1 (supplementary material Fig. S1D). Therefore, we conclude that Fzo1 dimerization depends on Ugo1 and relies on the C-terminal coiled-coil of Fzo1.

**Fzo1 cis dimers further interact in trans providing mitochondrial OM tethering**

In vitro assays have demonstrated that mitochondrial proximity allows the fusion of opposing OM by facilitating the formation of Fzo1 tethering complexes in trans, i.e. between two mitochondria (Meeusen et al., 2004). Moreover, co-immunoprecipitation studies using mammalian mitochondria-derived vesicles expressing HA- or FLAG-Mfn1 revealed the formation of mitofusin tethering

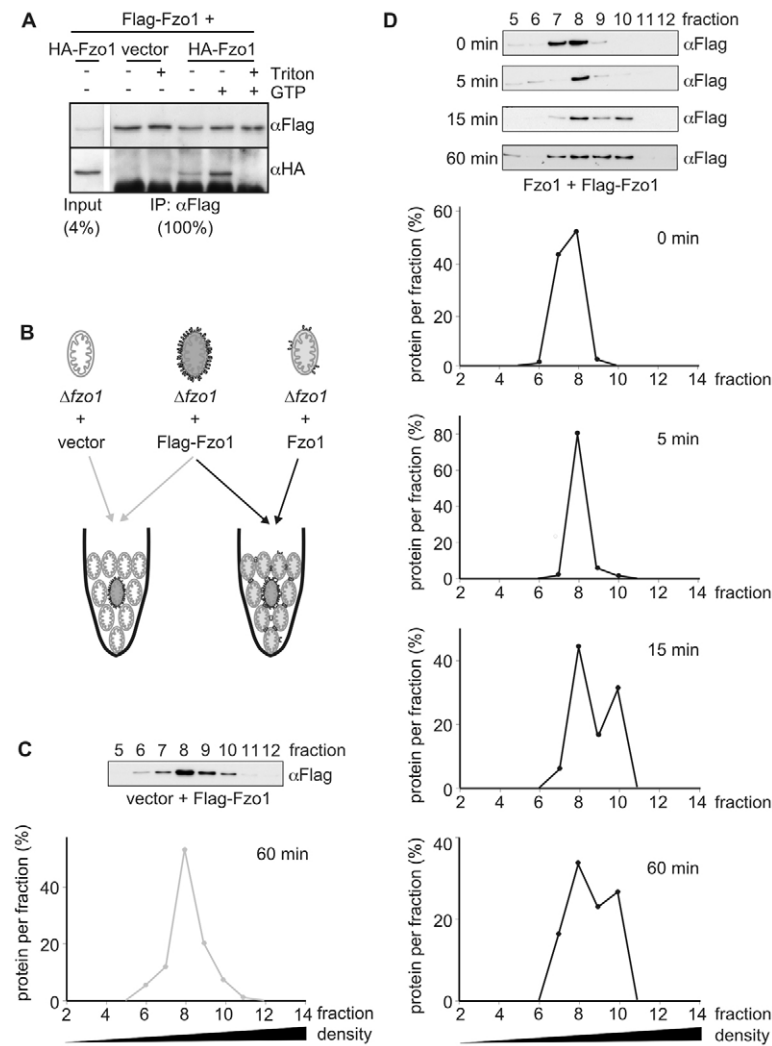

**Fig. 3. Fzo1 trans interactions.** (A) Binding of HA-Fzo1 containing vesicles to vesicles harbouring FLAG-Fzo1. Crude mitochondria from *Δfzo1* cells expressing FLAG-Fzo1 or HA-Fzo1 were sonicated. Vesicles from FLAG-Fzo1-expressing mitochondria were mixed with vesicles derived from *Δfzo1* mitochondria expressing HA-Fzo1 or not. The reaction mixtures were treated with 1% Triton X-100 when indicated and subjected to immunoprecipitation using FLAG-specific antibodies. Input and immunoprecipitates were analysed by immunoblotting using HA-specific antibodies. (B) Schematic representation of the mitochondrial tethering assay. (C,D) Formation of trans Fzo1 complexes. Sucrose gradient centrifugation analysis were performed as described in Fig. 2B but using ~10 mg/ml crude mitochondrial extracts, i.e. tenfold more concentrated mitochondria. Mitochondria harbouring FLAG-Fzo1 were mixed for the indicated times in a 1:9 ratio with either *Δfzo1* mitochondria (in C) or *Δfzo1* mitochondria expressing Fzo1 (in D). Immunoblots were performed using FLAG-specific antibodies.

complexes in trans (Ishihara et al., 2004). To assess trans tethering of OMs, we performed similar co-immunoprecipitation assays using yeast mitochondria-derived vesicles prepared by sonication of  $\Delta fzo1$  mitochondria harbouring HA- or FLAG-Fzo1. The FLAG-Fzo1-containing vesicles were mixed with either  $\Delta fzo1$ -derived vesicles or with vesicles harbouring HA-Fzo1. The FLAG-Fzo1 vesicles were precipitated using FLAG-specific antibodies. We successfully recovered HA-Fzo1-containing vesicles using FLAG-specific antibodies, indicating trans tethering (Fig. 3A). Addition of GTP increased tethering, whereas no signal could be recovered if  $\Delta fzo1$  vesicles were used as the binding partner (Fig. 3A). Moreover, no HA signal was recovered if the vesicles were detergent-solubilized before immunoprecipitation (Fig. 3A), confirming a specific interaction between Fzo1 vesicles in trans.

We further investigated the nature of the Fzo1 trans complex using sucrose gradient centrifugation assays. We expressed differently tagged Fzo1 proteins in  $\Delta fzo1$  cells, isolated mitochondria, and mixed mitochondria harbouring different Fzo1 variants (Fig. 3B). To promote trans tethering,  $\sim 10$  mg/ml mitochondrial extracts were used, i.e. a tenfold higher concentration than in the previous sucrose gradient centrifugation assays. Image analysis and co-immunoprecipitation experiments were consistent with the presence of tethered organelles under these conditions (data not shown). To directly assess trans Fzo1 associations, we compared the assembly status of FLAG-Fzo1 when mixed with either  $\Delta fzo1$  mitochondria (only allowing cis interactions) or mitochondria from  $\Delta fzo1$  cells expressing Fzo1 (allowing Fzo1-dependent trans interactions). To monitor the formation of Fzo1 trans complexes over time, the reaction was stopped at different time points by increasing the volume, thus diluting the mitochondrial extracts. Mitochondrial membranes were then solubilized and analysed by sucrose gradient centrifugation. Importantly, if FLAG-Fzo1-containing mitochondria were mixed with  $\Delta fzo1$  mitochondria, FLAG-Fzo1 was exclusively detected in fractions corresponding to the cis dimeric Fzo1 complex (Fig. 3C). FLAG-Fzo1 was  $\sim 30$ -fold overexpressed in these cells (compare the two first lanes in Fig. 1B), demonstrating that high Fzo1 concentrations in cis do not change the Fzo1 assembly behaviour.

By contrast, FLAG-Fzo1 formed larger complexes in a time-dependent manner if FLAG-Fzo1 mitochondria were mixed with  $\Delta fzo1$  mitochondria containing Fzo1 at endogenous levels (Fig. 3D). These results indicate that Fzo1 tethers two mitochondrial membranes in trans.

### Fzo1 trans assembly requires GTP binding but not GTP hydrolysis

We next studied the role of guanine nucleotides in the formation of Fzo1 trans complexes in concentrated mitochondria. When wild-type cells were analysed by sucrose gradient centrifugation, Fzo1 was recovered in a significantly broader peak under these conditions (Fig. 4A and supplementary material Fig. S2A), consistent with the presence of both cis dimer and trans complexes. Whereas nucleoside triphosphate (NTP) depletion inhibited the trans complexes (supplementary material Fig. S2B), addition of GTP or the non-hydrolysable GTP analogue GTP $\gamma$ S both resulted in a significant increase of the apparent molecular mass of the Fzo1 complex (Fig. 4A,B and supplementary material Fig. S2A,C). This indicated that trans association does not rely on GTP hydrolysis. By contrast, Fzo1<sup>D195A</sup> harbouring a mutation in the P-loop did not form Fzo1 trans complexes under these conditions and was detected in fractions corresponding to the monomer (Fig. 4B and supplementary material Fig. S2C). Notably, the equal behaviour of Fzo1<sup>D195A</sup> in experiments using low or high concentrations of mitochondria demonstrates that the protein:detergent ratio does not influence Fzo1 assembly per se. In conclusion, these experiments suggest that trans association depends on GTP binding to Fzo1, whereas GTP hydrolysis allows membrane fusion after membrane tethering.

Further, the role of the Fzo1-interacting proteins Ugo1 and Mdm30 for trans assembly of Fzo1 complexes was analysed. Fzo1 formed mainly the higher order complexes when concentrated  $\Delta mdm30$  mitochondria were used (Fig. 4C and supplementary material Fig. S2D). Therefore, Mdm30 appears to be required after Fzo1 dimerization and trans tethering. Consistently, electron microscopy analysis revealed aggregation of fragmented mitochondria in  $\Delta mdm30$  cells (Durr et al., 2006). By contrast, when concentrated  $\Delta ugo1$  mitochondria were analysed upon sucrose gradient centrifugation, Fzo1 distribution included

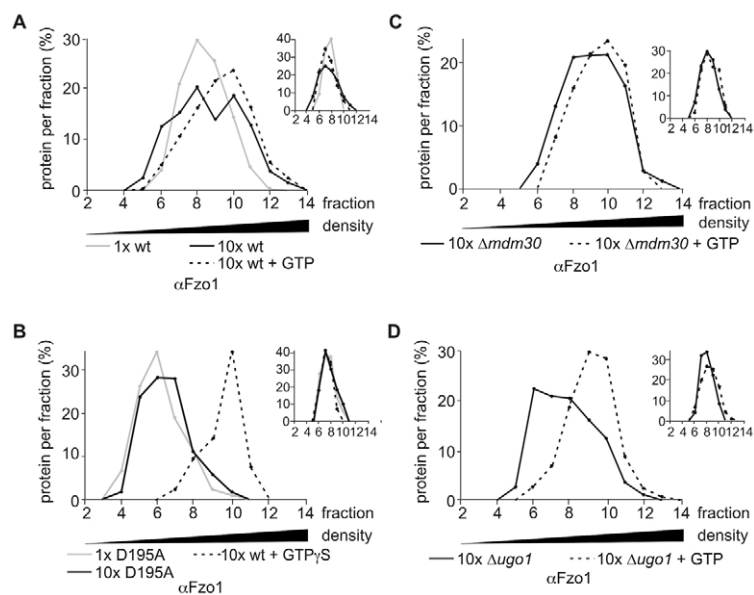

**Fig. 4. Endogenous Fzo1 trans interactions.** (A) Fzo1 complex formation in concentrated wild-type mitochondria. Approximately 1 mg/ml crude mitochondrial extracts from wild-type cells were fractionated by sucrose gradient centrifugation (1 $\times$  wt). Alternatively, mitochondria were analysed at a tenfold higher concentration (10 $\times$  wt) and 1 mM GTP was added when indicated. Immunoblots were performed using Fzo1-specific antibodies. (B) Effect of GTP binding and hydrolysis on Fzo1 complex formation. Crude mitochondrial extracts from wild-type cells or from  $\Delta fzo1$  cells expressing Fzo1<sup>D195A</sup> were analysed by sucrose gradient centrifugation as described in A. GTP $\gamma$ S (1 mM) was added when indicated. Immunoblots were performed using Fzo1-specific antibodies. (C,D) Fzo1 trans association in the absence of Mdm30 or Ugo1. Crude mitochondrial extracts from  $\Delta mdm30$  (C) or  $\Delta ugo1$  (D) cells with or without 1 mM GTP were analysed at high protein concentrations (10 $\times$ ). Immunoblots were performed using Fzo1-specific antibodies. Insets show fractionation of a crossreactive band as internal control.

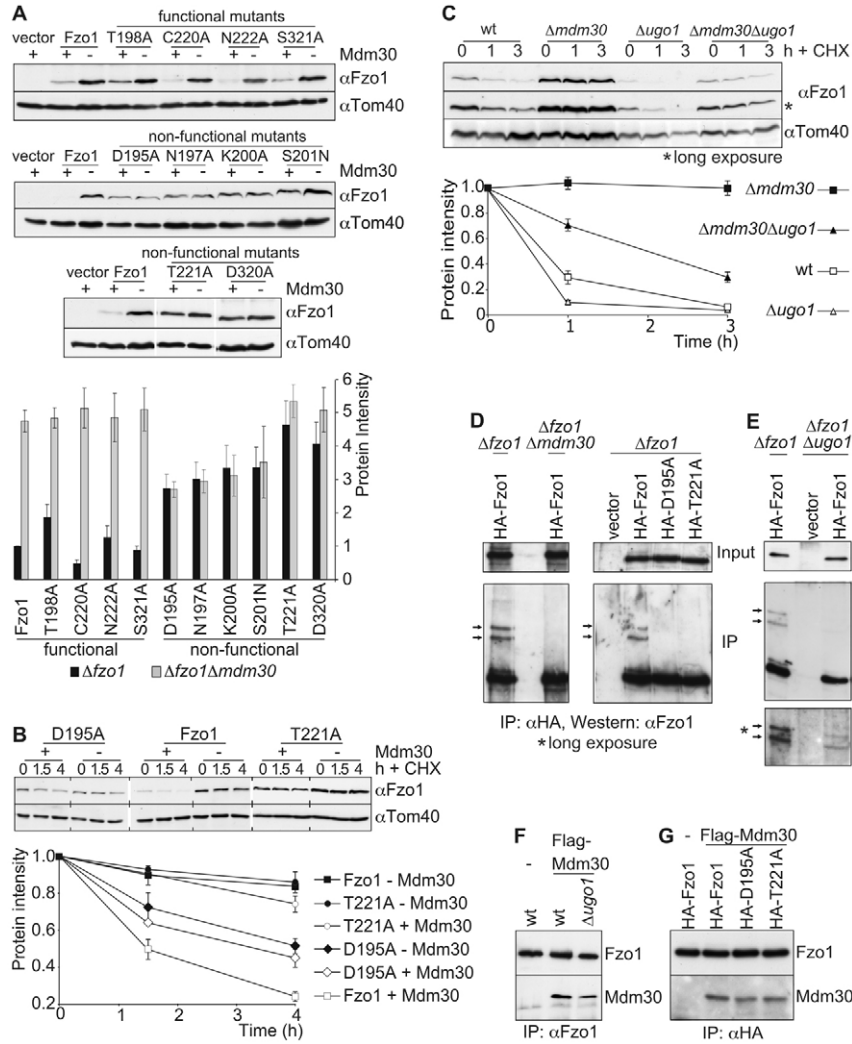

**Fig. 5. Mutations in the P-loop or the switch region of Fzo1 abolish the Mdm30-dependent degradation and ubiquitylation of Fzo1.** (A) Steady-state levels of Fzo1 mutant proteins. Total cellular extracts of  $\Delta fzo1$  (+Mdm30) and  $\Delta fzo1 \Delta mdm30$  (-Mdm30) strains expressing Fzo1 point mutants as indicated were analysed by SDS-PAGE and immunoblotting using Fzo1-specific antibodies. Tom40-specific antibodies were used as loading controls. A quantification including s.e.m. of four to seven independent experiments is shown in the bottom panel. (B) Stability of Fzo1<sup>D195A</sup> and Fzo1<sup>T221A</sup>. The stability of Fzo1 mutants was assessed after inhibition of cytosolic protein synthesis with cycloheximide (CHX) for the indicated times in exponentially growing  $\Delta fzo1$  (+Mdm30) and  $\Delta fzo1 \Delta mdm30$  (-Mdm30) cells (Escobar-Henriques et al., 2006). A quantification including s.e.m. of three independent experiments is shown in the lower panel. (C) Mdm30-dependence for Fzo1 turnover in the absence of Ugo1. Cycloheximide chase experiments in the presence or absence of Mdm30 and Ugo1 were performed and quantified as described in B. Three independent experiments using wild-type,  $\Delta mdm30$  and  $\Delta ugo1$  strains, and seven independent experiments for the  $\Delta mdm30 \Delta ugo1$  strain were quantified. Lower panel shows quantification of results with s.e.m. (D) Ubiquitylation of Fzo1<sup>D195A</sup> and Fzo1<sup>T221A</sup>. The indicated N-terminally HA-tagged Fzo1 forms, expressed in the indicated strains, were immunoprecipitated using HA-specific antibodies and analysed by SDS-PAGE and immunoblotting using Fzo1-specific antibodies. (E) Ubiquitylation of Fzo1 in  $\Delta ugo1$  cells was assayed as described for D. (F) Binding of Mdm30 to Fzo1 in the absence of Ugo1. Co-immunoprecipitation experiments were performed as previously described using crude mitochondrial preparations from wild-type (wt) or  $\Delta ugo1$  cells expressing Mdm30 harbouring an N-terminal FLAG-epitope, when indicated. Immunoprecipitation was performed using Fzo1-specific antibodies and analysed by SDS-PAGE and immunoblotting, using both Fzo1- and FLAG-specific antibodies (Escobar-Henriques et al., 2006). (G) Binding of Mdm30 to Fzo1 GTPase mutants. Immunoprecipitation of HA-Fzo1 forms was essentially performed as described for D from  $\Delta fzo1$  cells expressing the indicated Fzo1 variants. The immunoblotting was also analysed using FLAG-specific antibodies.

monomeric, dimeric or even larger complexes (Fig. 3D, solid line, and supplementary material Fig. S2E). Moreover, as observed for Fzo1 dimerization (Fig. 2E), addition of GTP completely compensated for the lack of Ugo1, as shown by Fzo1 recovery in trans tethering complexes under these conditions (Fig. 4D and supplementary material Fig. S2E).

We conclude from these experiments that cis dimers of Fzo1 further associate in trans to larger Fzo1 complexes. Trans tethering

depends on GTP binding and on Ugo1, whereas Mdm30 and GTP hydrolysis are required only after the tethering step.

**Fzo1 ubiquitylation and turnover occurs only after GTP hydrolysis**

Mdm30 is responsible for Fzo1 turnover in growing cells, which is required to maintain fusion-competent mitochondria (Cohen et al., 2008; Escobar-Henriques et al., 2006; Fritz et al., 2003).

Moreover, Fzo1 turnover depends on GTP hydrolysis (Amiott et al., 2009). To further examine the link between the degradation of Fzo1 and its GTPase function, we expressed various Fzo1 mutants (Fig. 2A) in  $\Delta fzo1$  and in  $\Delta fzo1\Delta mdm30$  cells and monitored their steady-state concentration. Fzo1 accumulated in the absence of Mdm30 as compared to wild-type cells (Fig. 5A, compare lanes 2 and 3) (Fritz et al., 2003). Similarly, functionally active Fzo1 mutants were present at increased concentrations in Mdm30-deficient mitochondria (Fig. 5A). By striking contrast, the presence of Mdm30 did not significantly affect the accumulation of non-functional Fzo1 mutants (Fig. 5A). Inhibition of protein synthesis by cycloheximide (CHX) revealed degradation of Fzo1<sup>D195A</sup>, which occurred in an Mdm30-independent manner and proceeded at slightly lower rates than in wild-type cells (Fig. 5B). The Fzo1<sup>T221A</sup> and Fzo1<sup>D320A</sup> forms accumulated to similar levels as Fzo1 in  $\Delta mdm30$  cells (Fig. 5A). Consistently, cycloheximide chase experiments confirmed that the Fzo1<sup>T221A</sup> represents a stable protein, even in the presence of Mdm30 (Fig. 5B). These findings are in agreement with recently published data (Amiott et al., 2009) and demonstrate that both binding and hydrolysis of GTP by Fzo1 are essential to allow Mdm30-dependent degradation of Fzo1 and to maintain low Fzo1 protein levels.

Next, we examined the importance of Ugo1 for the Mdm30-dependent degradation of Fzo1 because the deletion of *UGO1* impaired Fzo1 dimerization, as did the Fzo1 mutation D195A (Fig. 2). Similarly to Fzo1<sup>D195A</sup>, wild-type Fzo1 was degraded in an Mdm30-independent manner in the absence of Ugo1 (Fig. 5C). These results corroborate the idea that Fzo1 degradation mediated by Mdm30 depends on the formation of a functional Fzo1 complex. Experiments using truncated variants of Fzo1 further supported the conclusion that Fzo1 turnover requires a functional Fzo1 protein (supplementary material Fig. S3). Non-functional Fzo1 variants lacking N- or C-terminal amino acid residues were degraded regardless of the presence of Mdm30 (supplementary material Fig. S3A,C), although the truncated Fzo1 variants were still able to bind Mdm30 (supplementary material Fig. S3D). A further hint that Mdm30 acts as a part of the fusion events came from the observation that indirect blocking of tethering, i.e. inducing mitochondrial fragmentation by disrupting the actin cables with Latrunculin A (Boldogh et al., 1998), was accompanied by Fzo1 stabilization (supplementary material Fig. S3E,F).

Previous studies have identified distinct modified forms of Fzo1 that were demonstrated to contain ubiquitin (Cohen et al., 2008; Neutzner et al., 2007). Ubiquitylation of Fzo1 depends on Mdm30 (Cohen et al., 2008) (Fig. 5D, left panel) and requires GTP binding and hydrolysis by Fzo1 (Amiott et al., 2009) (Fig. 5D, right panel). Therefore, we examined the role of Ugo1 in Fzo1 ubiquitylation. Consistent with the tethering (Fig. 4D) and the turnover (Fig. 5C) data, immunoprecipitation experiments revealed that ubiquitylated Fzo1 was almost absent in  $\Delta ugo1$  cells (Fig. 5E). However, neither the absence of Ugo1 nor the mutations in the Fzo1 GTPase domain abolished Mdm30 binding to Fzo1 (Fig. 5F,G).

Taking the results together, we conclude that Mdm30-dependent Fzo1 ubiquitylation and degradation requires Ugo1 and occurs only after GTP hydrolysis by Fzo1 at late stages of OM fusion.

## Discussion

Our findings identify distinct steps in the mitochondrial OM fusion cycle mediated by mitofusins and refine the roles of two regulatory proteins, Ugo1 and Mdm30, in this process (Fig. 6). We demonstrate that mitofusins form homo-dimers in the mitochondrial OM. Fzo1

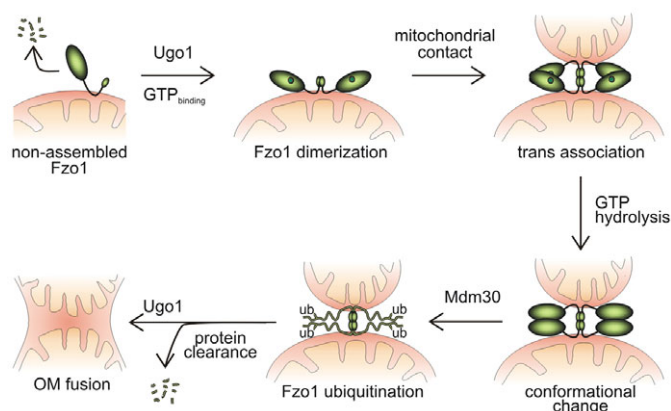

**Fig. 6. Model for the role of Ugo1 and Mdm30 during GTP-dependent OM fusion.** GTP binding and the Ugo1 protein mediate the cis dimerization of Fzo1, protecting it against degradation. Fzo1 dimers present in two different mitochondria can associate in trans and tether the organelles. The stoichiometry and composition of Fzo1-containing trans complexes is speculative. Subsequently, GTP hydrolysis might induce a conformational change that allows Mdm30 to promote Fzo1 ubiquitylation (ub). Degradation of Fzo1 terminates its role in fusion.

homo-dimerization depends on Ugo1 and binding of GTP to Fzo1, and is essential for OM fusion to proceed. Moreover, dimerization protects Fzo1 against Mdm30-independent turnover, indicating efficient quality control surveillance of non-assembled Fzo1. Mitochondrial close contacts induce mitochondrial tethering, which is triggered by Fzo1 trans complexes, probably composed of four Fzo1 subunits. GTP hydrolysis and Mdm30-dependent degradation complete the fusion of the OM. Thus, Ugo1 and Mdm30 act sequentially during Fzo1-mediated OM fusion.

## A dual role of Ugo1 during OM fusion

Our findings demonstrate that Ugo1 ensures efficient homo-dimerization of Fzo1 and therefore assign a function to Ugo1 in the early steps of OM fusion. Consistently, deletion of the C-terminal domain of Fzo1, one of the two regions mapped for the Ugo1–Fzo1 interaction (Sesaki and Jensen, 2004), destabilized dimerization. This suggests that Ugo1 might directly facilitate dimerization of Fzo1, perhaps by promoting GTP binding to Fzo1 or by ‘chaperoning’ newly imported, monomeric Fzo1 molecules. At the same time, in vitro fusion assays using Ugo1 point mutant variants point to a role of Ugo1 for the last, lipid-mixing step in OM fusion (Hoppins et al., 2009). In agreement with a role of Ugo1 at late stages of the fusion cycle, we observed residual levels of ubiquitylated Fzo1 in the absence of Ugo1. In fact, Ugo1 is absolutely essential for OM fusion (Hoppins et al., 2009), which suggests that in  $\Delta ugo1$  cells fusion is also blocked downstream of Fzo1 ubiquitylation. In mammals, the membrane merging step requires the activity of mitochondrial phospholipase D, which facilitates fusion by the hydrolysis of cardiolipin and the generation of phosphatidic acid (Choi et al., 2006). Although changes in cardiolipin levels per se do not interfere with Fzo1 dimerization (data not shown), it is conceivable that Ugo1 regulates the local lipid composition in the OM and thereby affects membrane fusion at early and late stages.

## Mdm30 acts after membrane tethering

Several lines of evidence point to a post-tethering role of Mdm30. First, formation of Fzo1 dimers and, most importantly, of Fzo1-

containing tethering complexes do not require the F-box protein Mdm30, which is consistent with the accumulation of aggregated mitochondrial fragments in  $\Delta$ *mdm30* cells (Durr et al., 2006). Second, these mitochondrial clusters represent stalled fusion-competent intermediates (Fritz et al., 2003) (and data not shown). Third, GTP hydrolysis is only required after trans tethering. Finally, Mdm30 triggers the ubiquitylation and degradation of Fzo1 only after trans tethering and GTP hydrolysis, pointing to an intimate coupling of the GTPase function of Fzo1 and its degradation during OM fusion. This is in agreement with the recently reported effect of a mutation in the GTPase domain of Fzo1 created in analogy to mutations from Charcot-Marie-Tooth hereditary neuropathy type 2A (CMT2A) patients (Amiott et al., 2009). In analogy to other GTPases, we speculate that a modified conformation of Fzo1 after GTP hydrolysis might allow its ubiquitylation and degradation. Interestingly, other F-box proteins have been connected to the regulation of GTPases (Kleijnen et al., 2007; Lafourcade et al., 2003; Mahler et al., 2009; Yu et al., 2008). For instance, the F-box protein Rcy1 activates the GTPase Ypt6, the yeast homologue of the human Rab6 protein, which is required for fusion of endosome-derived vesicles with the late Golgi (Lafourcade et al., 2003).

### Mdm30-dependent and Mdm30-independent Fzo1 turnover

Different proteolytic pathways have been described for the degradation of Fzo1 under various physiological conditions, and are distinct in their dependence on Mdm30. Fzo1 is degraded in an Mdm30-independent manner upon mating factor treatment of yeast cells (Neutzner and Youle, 2005). Under these conditions, degradation of the fusion protein Fzo1 is accompanied by fragmentation of the mitochondrial network due to ongoing fission processes. By contrast, Fzo1 proteolysis in proliferative yeast cells is regulated by Mdm30 and promotes mitochondrial fusion (Cohen et al., 2008; Escobar-Henriques et al., 2006). This observation seems paradoxical but is explained by our findings. During OM fusion, Fzo1 ubiquitylation and degradation take place only after membrane tethering and GTP hydrolysis, i.e. after Fzo1 has accomplished its biological function. Although the ATP-dependent dissociation of SNARE complexes allows a new fusion cycle during SNARE-mediated membrane fusion, Fzo1 tethering complexes are ubiquitylated and degraded. The physical interaction between Mdm30 and Fzo1 suggests that Fzo1 ubiquitylation occurs at the fusion site. Ubiquitylation of Fzo1 complexes after GTP hydrolysis might be important in overcoming a steric hindrance for membrane fusion imposed by the tethering structures. It is noteworthy that crystal structure studies performed with the C-terminal cytosolic domain of Mfn1 revealed antiparallel helical interactions between their C-terminal coiled-coil domains (Koshiba et al., 2004), therefore oriented perpendicular to the membrane surface. This is in contrast to SNAREs tethering complexes, which are formed by parallel coiled-coil interactions, oriented parallel to the membrane surface and allowing closer membrane contacts (Sutton et al., 1998). Our findings suggest that ubiquitylation and clearance of mitofusins facilitate close membrane approximation and increase the efficiency of OM fusion, therefore pointing to an unusual and irreversible mechanism of a GTPase.

### Materials and Methods

#### Yeast strains and growth media

Yeast strains are isogenic to the S288c (Euroscarf) and were grown according to standard procedures on complete or synthetic media supplemented with 2% (w/v) glucose or with 2% (w/v) glycerol. Cycloheximide (Sigma) (100  $\mu$ g/ml from a stock

at 10 mg/ml in ethanol) or Latrunculin A (Calbiochem) (10  $\mu$ M from a stock at 2 mM in DMSO) were added when indicated.

#### Plasmids

Fzo1 or Mdm30 harbouring an N-terminal FLAG-tag were expressed from the multicopy vector pJDCX2 (2  $\mu$ , *LEU2*, *CUP1* promoter) (Escobar-Henriques et al., 2006). The mutant FLAG-Fzo1<sup>D195A</sup> was generated using this construct by site-directed mutagenesis. Fzo1 or the indicated Fzo1 truncated forms harbouring an N-terminal hemagglutinin (HA) tag were expressed under the control of the endogenous Fzo1 promoter using the centromeric plasmid pRS316. Fzo1 point mutants with or without the HA tag were generated by site-directed mutagenesis using this Fzo1 construct in pRS316. For visualizing mitochondria, the centromeric plasmid pYX142-mtGFP, encoding the mitochondrial matrix-targeted GFP, was used (Westermann and Neupert, 2000). All newly created constructs were verified by DNA sequencing.

#### Size-exclusion chromatography

Mitochondrial extracts (600  $\mu$ g) (Tatsuta and Langer, 2007) were solubilized in 1% (v/v) Triton X-100 using buffer A (150 mM potassium acetate, 4 mM magnesium acetate, 30 mM Tris-HCl pH 7.4, 0.5 mM PMSF) and fractionated by size-exclusion chromatography on a Superose 6 column (Amersham Biosciences), as described (Rapaport et al., 1998). Fractions of 0.5 ml were collected, precipitated with trichloroacetic acid, and analysed by SDS-PAGE and immunoblotting. The column was calibrated using the soluble proteins tyroglobulin (669 kDa), apoferritin (443 kDa), alcohol dehydrogenase (150 kDa) and bovine serum albumin (66 kDa) as standards.

#### Purification and crosslinking of Fzo1

FLAG-Fzo1 or FLAG-Fzo1<sup>D195A</sup> were expressed in wild-type or  $\Delta$ *fzo1* yeast cells and 100 OD<sub>600</sub> of exponentially growing cultures were collected. Crude mitochondria were isolated as described (Tatsuta and Langer, 2007) and lysed for 45 minutes at 4°C in 500  $\mu$ l solubilization buffer A, containing 1% Triton X-100 (Rapaport et al., 1998). Lysates were cleared by centrifugation at 4°C and 16,000 g for 10 minutes and incubated for 2 hours at 4°C with EZview Red ANTI-FLAG M2 Affinity Gel (Sigma). The resin was washed three times with 500  $\mu$ l of the same buffer but containing 0.2% (v/v) Triton X-100. The bound protein was eluted with 5  $\mu$ l of 3 $\times$  FLAG peptide (Sigma) (stock 5 mg/ml in TBS) in a total volume of 45  $\mu$ l buffer A at 4°C for 2 hours. The crosslinking reaction of purified Fzo1 protein was performed at 4°C with 0.02% glutaraldehyde in buffer A, for 2 hours if not indicated otherwise. The reaction was stopped by addition of 4 $\times$  Laemmli buffer (Laemmli, 1970) if subjected to SDS-PAGE and the sample subsequently immunoblotted. If followed by size-exclusion chromatography, the crosslinking reaction was stopped by adding glycine to 1% (w/v). Aliquots of 20  $\mu$ l purified Fzo1, crosslinked or not, were then diluted to 100  $\mu$ l in buffer A and fractionated by size-exclusion chromatography as described above.

#### Sucrose density gradient centrifugation

Crude mitochondrial preparations (400–600  $\mu$ g) (Rapaport et al., 1998), obtained from 50–75 OD<sub>600</sub> exponentially growing cells of the indicated strains, were lysed for 30 minutes at 4°C in 500  $\mu$ l of solubilization buffer B [1% (w/v) digitonin, 50 mM Tris-HCl pH 7.4, 150 mM NaCl, complete EDTA-free protease inhibitor cocktail (Roche Molecular Biochemicals)]. When indicated, crude mitochondria were first incubated with 1 mM GTP for 1 hour at 30°C in 400  $\mu$ l buffer B without detergent and then solubilized for 30 minutes at 4°C by further addition of 100  $\mu$ l 5% (w/v) digitonin in buffer B. The lysates were cleared by centrifugation at 16,000 g and 4°C for 10 minutes, and the supernatant loaded on top of an 11-ml 5–25% (w/v) sucrose gradient prepared in solubilization buffer B but with 0.1% (w/v) digitonin. The gradients were centrifuged at 174,000 g and 4°C for 14 hours, and afterwards 28 fractions of 400  $\mu$ l were collected from the top, precipitated with trichloroacetic acid and analysed by SDS-PAGE and immunoblotting. Blots were quantified using Quantity One (BioRad, Hercules, CA). A crossreactive band detected with the Fzo1 antibody was used as an internal standard for comparison of the fractionation between two or more different gradients.

#### Blue native gel electrophoresis

The native molecular mass of the Fzo1 complex was analysed as previously described (Schägger, 2001), using modified buffer conditions (Tatsuta et al., 2005). Essentially, 100  $\mu$ g of mitochondrial extracts were lysed in 25  $\mu$ l solubilization buffer C [1% (w/v) digitonin, 50 mM NaCl, 5 mM aminohexanoic acid, 50 mM imidazol/HCl pH 7.4, 10% glycerol, 50 mM potassium phosphate buffer pH 7.4] for 20 minutes at 4°C. The lysates were cleared by centrifugation at 16,000 g and 4°C for 10 minutes. The supernatant was mixed with 1/10 1% (w/v) Coomassie Blue in solubilization buffer C and loaded onto a 3–13% acrylamide (w/v) blue native gel.

#### Immunoisolation of membrane vesicles containing Fzo1 proteins

Trans Fzo1 physical interactions were analysed essentially as previously described for mitofusins (Ishihara et al., 2004). FLAG-Fzo1 or HA-Fzo1 were expressed in  $\Delta$ *fzo1* yeast cells and 150 OD<sub>600</sub> of exponentially growing cultures were collected. Crude mitochondrial pellets (~1.2 mg), prepared as described (Rapaport et al., 1998),



were resuspended in 100  $\mu$ l of buffer B and sonicated with a Branson sonifier (output control 5.5, duty cycle 40%, 75 seconds, output level 20 W, 5-mm diameter microtip, on ice). Unbroken organelles were removed by two centrifugations at 4,000 g and 4°C for 4 minutes, and the supernatants containing vesiculated membranes were recovered. FLAG-Fzo1 vesicles (10  $\mu$ l) were mixed with 90  $\mu$ l of either  $\Delta$ fzo1 or HA-Fzo1 vesicles and incubated with or without 1 mM GTP at 30°C for 1 hour. The samples were then further incubated for 20 minutes on ice with or without 1% Triton X-100. After incubation, 400  $\mu$ l buffer B without detergent was added and samples were centrifuged at 1,500 g and 4°C for 4 minutes to remove membrane aggregates. The supernatant was incubated overnight at 4°C with EZview Red ANTI-FLAG M2 Affinity Gel (Sigma). The resin was washed three times with 500  $\mu$ l of buffer B without detergent. The bound protein was eluted with 40  $\mu$ l Laemmli buffer at 65°C for 20 minutes, subjected to SDS-PAGE, and subsequently immunoblotted using HA- and FLAG-specific antibodies. About 30% of the total FLAG-Fzo1-containing vesicles were immunoprecipitated and ~4% of the total HA-Fzo1-containing vesicles could be co-immunoprecipitated.

#### Analysis of Fzo1 assembly in trans

Crude mitochondria from 50–75 OD<sub>600</sub> exponentially growing  $\Delta$ fzo1 yeast cells overexpressing FLAG-Fzo1 or expressing Fzo1 were prepared as described (Rapaport et al., 1998). Each mitochondrial preparation was resuspended in 50  $\mu$ l of buffer B without detergent, obtaining ~10 mg/ml of protein. FLAG-Fzo1 mitochondria (5  $\mu$ l) were mixed with 45  $\mu$ l of either  $\Delta$ fzo1 or HA-Fzo1 mitochondria and incubated at 30°C for the indicated times. The tethering reaction was stopped by addition of 350  $\mu$ l buffer B and further solubilized by addition of 100  $\mu$ l 5% (w/v) digitonin in buffer B for 30 minutes at 4°C. The lysates were cleared and analysed by sucrose density gradient centrifugation as described above.

For analysis of endogenous Fzo1, crude mitochondria from 50–75 OD<sub>600</sub> exponentially growing cells were prepared. For the experiments labelled 10 $\times$ , mitochondria were resuspended in 40  $\mu$ l buffer B without detergent (i.e. to ~10 mg/ml). When indicated, samples were incubated for 1 hour at 30°C with or without 1 mM GTP or GTP $\gamma$ S or alkaline phosphatase (2  $\mu$ l calf intestinal phosphatase; New England Biolabs, Ipswich, MA). Then, samples were solubilized for 30 minutes at 4°C by further addition of 10  $\mu$ l 5% (w/v) digitonin in buffer B. The lysates were cleared and analysed by sucrose gradient centrifugation as described above. Experiments labeled 1 $\times$  refer to the sucrose gradient analysis described above, i.e. in 500  $\mu$ l of buffer B with 1% (w/v) digitonin.

#### Protein steady-state levels and synthesis shutoff

For analysis of Fzo1 steady-state levels, cells were grown in SD medium and samples collected during the exponential growth phase. To monitor Fzo1 turnover, cycloheximide was added to logarithmically growing cells. Samples were collected at the indicated time points, and total proteins extracted at alkaline pH (Tatsuta and Langer, 2007) were analysed by SDS-PAGE and immunoblotting. Western blots were quantified using Quantity One (BioRad). Mean values of three to seven different experiments are shown. The error bars reflects the s.e.m. (Cumming et al., 2007). Fzo1 levels in  $\Delta$ fzo1 cells expressing Fzo1 from a centromeric plasmid and its endogenous promoter were set to 1.

#### Ubiquitylation assay

Immunoprecipitation of ubiquitylated Fzo1 was performed as previously described (Neuber et al., 2005) except that 25 mM *N*-ethylmaleimide was added before crude membrane extraction. Yeast strains were transformed with HA-Fzo1, HA-Fzo1<sup>D195A</sup> or HA-Fzo1<sup>T221A</sup> and grown in synthetic media to the logarithmic growth phase. Crude membrane extracts (Neuber et al., 2005) from 400 OD<sub>600</sub> cells were solubilized in 1% (w/v) digitonin in buffer A and cleared by centrifugation. Lysates were immunoprecipitated overnight with 5  $\mu$ l of the HA antibody (H 6908; Sigma-Aldrich). Bound protein was eluted in 40  $\mu$ l Laemmli buffer at 65°C for 20 minutes, subjected to SDS-PAGE and subsequently immunoblotted using Fzo1-specific antibodies.

We are grateful to Jodi Nunnari (University of California, Davis, CA) for the Fzo1 antibody, and to Steffen Augustin, Sascha Dargazanli, Carsten Merkwirth, Oliver Neuber, Christof Osman and Takashi Tatsuta for technical advice. We also thank Bertrand Daignan-Fornier, Sven Saube and Julia Hunn for critical reading of the manuscript, Bertrand Daignan-Fornier for support to M.E.-H. and to Jürgen Dohmen and Martin Graef for stimulating discussions. This work was supported by grants of the Deutsche Forschungsgemeinschaft (ES 338/1-1 to M.E.-H., SFB635 to G.J.K.P. and T.L.) and the European Research Council to T.L.

Supplementary material available online at

<http://jcs.biologists.org/cgi/content/full/124/7/1126/DC1>

## References

- Amiott, E. A., Cohen, M. M., Saint-Georges, Y., Weissman, A. M. and Shaw, J. M. (2009). A mutation associated with CMT2A neuropathy causes defects in Fzo1 GTP hydrolysis, ubiquitylation, and protein turnover. *Mol. Biol. Cell* **20**, 5026–5035.
- Arlt, H., Tauer, R., Feldmann, H., Neupert, W. and Langer, T. (1996). The YTA10-12-complex, an AAA protease with chaperone-like activity in the inner membrane of mitochondria. *Cell* **85**, 875–885.
- Boldogh, I., Vojtov, N., Karmon, S. and Pon, L. A. (1998). Interaction between mitochondria and the actin cytoskeleton in budding yeast requires two integral mitochondrial outer membrane proteins, Mmm1p and Mdm10p. *J. Cell Biol.* **141**, 1371–1381.
- Choi, S. Y., Huang, P., Jenkins, G. M., Chan, D. C., Schiller, J. and Frohman, M. A. (2006). A common lipid links Mfn-mediated mitochondrial fusion and SNARE-regulated exocytosis. *Nat. Cell Biol.* **8**, 1255–1262.
- Cohen, M. M., Lebouche, G. P., Livnat-Levanon, N., Glickman, M. H. and Weissman, A. M. (2008). Ubiquitin-proteasome-dependent degradation of a mitofusin, a critical regulator of mitochondrial fusion. *Mol. Biol. Cell* **19**, 2457–2464.
- Coonrod, E. M., Karren, M. A. and Shaw, J. M. (2007). Ugo1p is a multipass transmembrane protein with a single carrier domain required for mitochondrial fusion. *Traffic* **8**, 500–511.
- Cumming, G., Fidler, F. and Vaux, D. L. (2007). Error bars in experimental biology. *J. Cell Biol.* **177**, 7–11.
- Detmer, S. A. and Chan, D. C. (2007). Functions and dysfunctions of mitochondrial dynamics. *Nat. Rev. Mol. Cell Biol.* **8**, 870–879.
- DeVay, R. M., Dominguez-Ramirez, L., Lackner, L. L., Hoppins, S., Stahlberg, H. and Nunnari, J. (2009). Coassembly of Mgm1 isoforms requires cardiolipin and mediates mitochondrial inner membrane fusion. *J. Cell Biol.* **186**, 793–803.
- Dimmer, K. S., Fritz, S., Fuchs, F., Messerschmitt, M., Weinbach, N., Neupert, W. and Westermann, B. (2002). Genetic basis of mitochondrial function and morphology in *Saccharomyces cerevisiae*. *Mol. Biol. Cell* **13**, 847–853.
- Durr, M., Escobar-Henriques, M., Merz, S., Geimer, S., Langer, T. and Westermann, B. (2006). Nonredundant roles of mitochondria-associated F-box proteins Mfb1 and Mdm30 in maintenance of mitochondrial morphology in yeast. *Mol. Biol. Cell* **17**, 3745–3755.
- Escobar-Henriques, M., Westermann, B. and Langer, T. (2006). Regulation of mitochondrial fusion by the F-box protein Mdm30 involves proteasome-independent turnover of Fzo1. *J. Cell Biol.* **173**, 645–650.
- Eura, Y., Ishihara, N., Yokota, S. and Mihara, K. (2003). Two mitofusin proteins, mammalian homologs of FZO, with distinct functions are both required for mitochondrial fusion. *J. Biochem. (Tokyo)* **134**, 333–344.
- Fritz, S., Weinbach, N. and Westermann, B. (2003). Mdm30 is an F-box protein required for maintenance of fusion-competent mitochondria in yeast. *Mol. Biol. Cell* **14**, 2303–2313.
- Fuchs, F., Prokisch, H., Neupert, W. and Westermann, B. (2002). Interaction of mitochondrial fusion with microtubules in the filamentous fungus *Neurospora crassa*. *J. Cell Sci.* **115**, 1931–1937.
- Gasper, R., Meyer, S., Gotthardt, K., Sirajuddin, M. and Wittinghofer, A. (2009). It takes two to tango: regulation of G proteins by dimerization. *Nat. Rev. Mol. Cell Biol.* **10**, 423–429.
- Griffin, E. E. and Chan, D. C. (2006). Domain interactions within Fzo1 oligomers are essential for mitochondrial fusion. *J. Biol. Chem.* **281**, 16599–16606.
- Hales, K. G. and Fuller, M. T. (1997). Developmentally regulated mitochondrial fusion mediated by a conserved, novel, predicted GTPase. *Cell* **90**, 121–129.
- Herlan, M., Vogel, F., Bornhövd, C., Neupert, W. and Reichert, A. S. (2003). Processing of Mgm1 by the rhomboid-type protease Pep1 is required for maintenance of mitochondrial morphology and of mitochondrial DNA. *J. Biol. Chem.* **278**, 27781–27788.
- Hermann, G. J., Thatcher, J. W., Mills, J. P., Hales, K. G., Fuller, M. T., Nunnari, J. and Shaw, J. M. (1998). Mitochondrial fusion in yeast requires the transmembrane GTPase Fzo1p. *J. Cell Biol.* **143**, 359–373.
- Hinshaw, J. E. and Schmid, S. L. (1995). Dynamin self-assembles into rings suggesting a mechanism for coated vesicle budding. *Nature* **374**, 190–192.
- Hoppins, S., Lackner, L. and Nunnari, J. (2007). The machines that divide and fuse mitochondria. *Annu. Rev. Biochem.* **76**, 751–780.
- Hoppins, S., Horner, J., Song, C., McCaffery, J. M. and Nunnari, J. (2009). Mitochondrial outer and inner membrane fusion requires a modified carrier protein. *J. Cell Biol.* **184**, 569–581.
- Ingerman, E., Perkins, E. M., Marino, M., Mears, J. A., McCaffery, J. M., Hinshaw, J. E. and Nunnari, J. (2005). Dnm1 forms spirals that are structurally tailored to fit mitochondria. *J. Cell Biol.* **170**, 1021–1027.
- Ishihara, N., Eura, Y. and Mihara, K. (2004). Mitofusin 1 and 2 play distinct roles in mitochondrial fusion reactions via GTPase activity. *J. Cell Sci.* **117**, 6535–6546.
- Kleijnen, M. F., Kirkpatrick, D. S. and Gygi, S. P. (2007). The ubiquitin-proteasome system regulates membrane fusion of yeast vacuoles. *EMBO J.* **26**, 275–287.
- Kornmann, B., Currie, E., Collins, S. R., Schuldiner, M., Nunnari, J., Weissman, J. S. and Walter, P. (2009). An ER-mitochondria tethering complex revealed by a synthetic biology screen. *Science* **325**, 477–481.
- Koshiba, T., Detmer, S. A., Kaiser, J. T., Chen, H., McCaffery, J. M. and Chan, D. C. (2004). Structural basis of mitochondrial tethering by mitofusin complexes. *Science* **305**, 858–862.
- Lackner, L. L. and Nunnari, J. M. (2008). The molecular mechanism and cellular functions of mitochondrial division. *Biochim. Biophys. Acta* **1792**, 1138–1144.
- Lackner, L. L., Horner, J. S. and Nunnari, J. (2009). Mechanistic analysis of a dynamin effector. *Science* **325**, 874–877.

- Laemmli, U. K. (1970). Cleavage of structural proteins during the assembly of the head of bacteriophage T4. *Nature* **227**, 680-685.
- Lafourcade, C., Galan, J. M. and Peter, M. (2003). Opposite roles of the F-box protein Rcy1p and the GTPase-activating protein Gyp2p during recycling of internalized proteins in yeast. *Genetics* **164**, 469-477.
- Leonhard, K., Herrmann, J. M., Stuart, R. A., Mannhaupt, G., Neupert, W. and Langer, T. (1996). AAA proteases with catalytic sites on opposite membrane surfaces comprise a proteolytic system for the ATP-dependent degradation of inner membrane proteins in mitochondria. *EMBO J.* **15**, 4218-4229.
- Li, Y., Chen, G. and Liu, W. (2010). Alterations in the interaction between GAL4 and GAL80 effect regulation of the yeast GAL regulon mediated by the F box protein Dsg1. *Curr. Microbiol.* **61**, 210-216.
- Mahlert, M., Vogler, C., Stelter, K., Hause, G. and Basse, C. W. (2009). The  $\alpha 2$  mating-type-locus gene Iga2 of *Ustilago maydis* interferes with mitochondrial dynamics and fusion, partially in dependence on a Dnm1-like fission component. *J. Cell Sci.* **122**, 2402-2412.
- Marks, B., Stowell, M. H., Vallis, Y., Mills, I. G., Gibson, A., Hopkins, C. R. and McMahon, H. T. (2001). GTPase activity of dynamin and resulting conformation change are essential for endocytosis. *Nature* **410**, 231-235.
- Martens, S. and McMahon, H. T. (2008). Mechanisms of membrane fusion: disparate players and common principles. *Nat. Rev. Mol. Cell Biol.* **9**, 543-556.
- Meeusen, S., McCaffery, J. M. and Nunnari, J. (2004). Mitochondrial fusion intermediates revealed in vitro. *Science* **305**, 1747-1752.
- Meeusen, S., DeVay, R., Block, J., Cassidy-Stone, A., Wayson, S., McCaffery, J. M. and Nunnari, J. (2006). Mitochondrial inner-membrane fusion and crista maintenance requires the dynamin-related GTPase Mgm1. *Cell* **127**, 383-395.
- Meglei, G. and McQuibban, G. A. (2009). The dynamin-related protein Mgm1p assembles into oligomers and hydrolyzes GTP to function in mitochondrial membrane fusion (dagger). *Biochemistry* **48**, 1774-1784.
- Muratani, M., Kung, C., Shokat, K. M. and Tansey, W. P. (2005). The F box protein Dsg1/Mdm30 is a transcriptional coactivator that stimulates Gal4 turnover and cotranscriptional mRNA processing. *Cell* **120**, 887-899.
- Neuber, O., Jarosch, E., Volkwein, C., Walter, J. and Sommer, T. (2005). Ubx2 links the Cdc48 complex to ER-associated protein degradation. *Nat. Cell Biol.* **7**, 993-998.
- Neuspiel, M., Zunino, R., Gangaraju, S., Rippstein, P. and McBride, H. (2005). Activated mitofusin 2 signals mitochondrial fusion, interferes with Bax activation, and reduces susceptibility to radical induced depolarization. *J. Biol. Chem.* **280**, 25060-25070.
- Neutzner, A. and Youle, R. J. (2005). Instability of the mitofusin Fzo1 regulates mitochondrial morphology during the mating response of the yeast *Saccharomyces cerevisiae*. *J. Biol. Chem.* **280**, 18598-18603.
- Neutzner, A., Youle, R. J. and Karbowski, M. (2007). Outer mitochondrial membrane protein degradation by the proteasome. *Novartis Found. Symp.* **287**, 4-14; discussion 14-20.
- Okamoto, K. and Shaw, J. M. (2005). Mitochondrial morphology and dynamics in yeast and multicellular eukaryotes. *Annu. Rev. Genet.* **39**, 503-536.
- Ota, K., Kito, K., Okada, S. and Ito, T. (2008). A proteomic screen reveals the mitochondrial outer membrane protein Mdm34p as an essential target of the F-box protein Mdm30p. *Genes Cells* **13**, 1075-1085.
- Praefcke, G. J. and McMahon, H. T. (2004). The dynamin superfamily: universal membrane tubulation and fission molecules? *Nat. Rev. Mol. Cell Biol.* **5**, 133-147.
- Praefcke, G. J., Kloep, S., Benschaid, U., Lilie, H., Prakash, B. and Herrmann, C. (2004). Identification of residues in the human guanylate-binding protein 1 critical for nucleotide binding and cooperative GTP hydrolysis. *J. Mol. Biol.* **344**, 257-269.
- Rapaport, D., Brunner, M., Neupert, W. and Westermann, B. (1998). Fzo1p is a mitochondrial outer membrane protein essential for the biogenesis of functional mitochondria in *Saccharomyces cerevisiae*. *J. Biol. Chem.* **273**, 20150-20155.
- Rojo, M., Legros, F., Chateau, D. and Lombes, A. (2002). Membrane topology and mitochondrial targeting of mitofusins, ubiquitous mammalian homologs of the transmembrane GTPase Fzo. *J. Cell Sci.* **115**, 1663-1674.
- Rujiviphat, J., Meglei, G., Rubinstein, J. L. and McQuibban, G. A. (2009). Phospholipid association is essential for dynamin-related protein Mgm1 to function in mitochondrial membrane fusion. *J. Biol. Chem.* **284**, 28682-28686.
- Schägger, H. (2001). Blue-native gels to isolated protein complexes from mitochondria. *Methods Cell Biol.* **65**, 231-244.
- Sesaki, H. and Jensen, R. E. (2001). UGO1 encodes an outer membrane protein required for mitochondrial fusion. *J. Cell Biol.* **152**, 1123-1134.
- Sesaki, H. and Jensen, R. E. (2004). Ugo1p links the Fzo1p and Mgm1p GTPases for mitochondrial fusion. *J. Biol. Chem.* **279**, 28298-28303.
- Sesaki, H., Southard, S. M., Hobbs, A. E. and Jensen, R. E. (2003). Cells lacking Pcp1p/Ugo2p, a rhomboid-like protease required for Mgm1p processing, lose mtDNA and mitochondrial structure in a Dnm1p-dependent manner, but remain competent for mitochondrial fusion. *Biochem. Biophys. Res. Commun.* **308**, 276-283.
- Shukla, A., Durairaj, G., Schneider, J., Duan, Z., Shadle, T. and Bhaumik, S. R. (2009). Stimulation of mRNA export by an F-box protein, Mdm30p, in vivo. *J. Mol. Biol.* **389**, 238-247.
- Sutton, R. B., Fasshauer, D., Jahn, R. and Brunger, A. T. (1998). Crystal structure of a SNARE complex involved in synaptic exocytosis at 2.4 Å resolution. *Nature* **395**, 347-353.
- Tatsuta, T. and Langer, T. (2007). Studying proteolysis within mitochondria. *Methods Mol. Biol.* **372**, 343-360.
- Tatsuta, T., Model, K. and Langer, T. (2005). Formation of membrane-bound ring complexes by prohibitins in mitochondria. *Mol. Biol. Cell* **16**, 248-259.
- Vetter, I. R. and Wittinghofer, A. (2001). The guanine nucleotide-binding switch in three dimensions. *Science* **294**, 1299-1304.
- Westermann, B. and Neupert, W. (2000). Mitochondria-targeted green fluorescent proteins: convenient tools for the study of organelle biogenesis in *Saccharomyces cerevisiae*. *Yeast* **16**, 1421-1427.
- Wong, E. D., Wagner, J. A., Scott, S. V., Okreglak, V., Holewinske, T. J., Cassidy-Stone, A. and Nunnari, J. (2003). The intramitochondrial dynamin-related GTPase, Mgm1p, is a component of a protein complex that mediates mitochondrial fusion. *J. Cell Biol.* **160**, 303-311.
- Yu, H., Braun, P., Yildirim, M. A., Lemmens, I., Venkatesan, K., Sahalie, J., Hirozane-Kishikawa, T., Gebreab, F., Li, N., Simonis, N. et al. (2008). High-quality binary protein interaction map of the yeast interactome network. *Science* **322**, 104-110.
- Zick, M., Duvezin-Caubet, S., Schafer, A., Vogel, F., Neupert, W. and Reichert, A. S. (2009). Distinct roles of the two isoforms of the dynamin-like GTPase Mgm1 in mitochondrial fusion. *FEBS Lett.* **583**, 2237-2243.
